# Supplementary material for: The heat capacities and critical behaviors of binary ionic solutions
Source: Royal Society of Chemistry journal article supplement (doi:10.1039/c7cp08604k), 2018-01-01
Supplement: c7cp08604k1.pdf [file c7cp08604k1.pdf]

# **The heat capacities and critical behaviors of binary ionic solutions**

Xue Wang <sup>a</sup>, Chen Xu <sup>a</sup>, Xiaoyi Tao <sup>a</sup>, Tianxiang Yin <sup>a</sup>, Zhiyun Chen <sup>a</sup>, Weiguo Shen <sup>a,b,\*</sup>

<sup>a</sup>School of Chemistry and Molecular Engineering, East China University of Science and Technology, Shanghai 200237, China

<sup>b</sup>Department of Chemistry, Lanzhou University, Lanzhou, Gansu 730000, China

\* Corresponding author Address: School of Chemistry and Molecular Engineering, East China University of Science and Technology, Shanghai 200237, China.

E-mail address: shenwg@ecust.edu.cn

Tel.: +86 21 64253966; Fax: +86 21 64250804.

**Table 1 A part of data of the isobaric heat capacity per unit volume at the critical composition and their uncertainties  $\delta C_p V^{-1}$  at different temperatures for  $\{(1-x_c) \text{ 1,2-butanediol} + x_c [\text{C}_4\text{mim}][\text{BF}_4]\}$  ( $T_c=298.716 \text{ K}$ )**

| $T$<br>(K) | $C_p V^{-1}$<br>(J·cm <sup>-3</sup> ·K <sup>-1</sup> ) | $\delta C_p V^{-1}$<br>(J·cm <sup>-3</sup> ·K <sup>-1</sup> ) | $T$<br>(K) | $C_p V^{-1}$<br>(J·cm <sup>-3</sup> ·K <sup>-1</sup> ) | $\delta C_p V^{-1}$<br>(J·cm <sup>-3</sup> ·K <sup>-1</sup> ) | $T$<br>(K) | $C_p V^{-1}$<br>(J·cm <sup>-3</sup> ·K <sup>-1</sup> ) | $\delta C_p V^{-1}$<br>(J·cm <sup>-3</sup> ·K <sup>-1</sup> ) |
|------------|--------------------------------------------------------|---------------------------------------------------------------|------------|--------------------------------------------------------|---------------------------------------------------------------|------------|--------------------------------------------------------|---------------------------------------------------------------|
| 337.863    | 2.402                                                  | 0.020                                                         | 317.222    | 2.493                                                  | 0.026                                                         | 302.601    | 2.551                                                  | 0.033                                                         |
| 337.234    | 2.395                                                  | 0.020                                                         | 316.596    | 2.493                                                  | 0.026                                                         | 302.316    | 2.559                                                  | 0.033                                                         |
| 336.609    | 2.432                                                  | 0.021                                                         | 315.971    | 2.494                                                  | 0.027                                                         | 302.030    | 2.563                                                  | 0.034                                                         |
| 335.982    | 2.466                                                  | 0.022                                                         | 315.346    | 2.496                                                  | 0.027                                                         | 301.745    | 2.569                                                  | 0.034                                                         |
| 335.358    | 2.477                                                  | 0.022                                                         | 314.720    | 2.496                                                  | 0.027                                                         | 301.459    | 2.565                                                  | 0.034                                                         |
| 334.732    | 2.480                                                  | 0.022                                                         | 314.095    | 2.498                                                  | 0.027                                                         | 301.174    | 2.585                                                  | 0.035                                                         |
| 334.107    | 2.482                                                  | 0.023                                                         | 313.470    | 2.499                                                  | 0.027                                                         | 300.888    | 2.585                                                  | 0.035                                                         |
| 333.481    | 2.483                                                  | 0.023                                                         | 312.844    | 2.500                                                  | 0.028                                                         | 300.602    | 2.593                                                  | 0.035                                                         |
| 332.856    | 2.485                                                  | 0.023                                                         | 312.218    | 2.500                                                  | 0.028                                                         | 300.317    | 2.610                                                  | 0.036                                                         |
| 332.230    | 2.484                                                  | 0.023                                                         | 311.593    | 2.502                                                  | 0.028                                                         | 300.031    | 2.634                                                  | 0.036                                                         |
| 331.605    | 2.482                                                  | 0.023                                                         | 310.968    | 2.503                                                  | 0.028                                                         | 299.746    | 2.641                                                  | 0.037                                                         |
| 330.979    | 2.485                                                  | 0.023                                                         | 310.343    | 2.505                                                  | 0.028                                                         | 299.460    | 2.655                                                  | 0.037                                                         |
| 330.354    | 2.484                                                  | 0.023                                                         | 309.717    | 2.507                                                  | 0.029                                                         | 299.174    | 2.685                                                  | 0.038                                                         |
| 329.729    | 2.484                                                  | 0.023                                                         | 309.092    | 2.509                                                  | 0.029                                                         | 298.888    | 2.766                                                  | 0.041                                                         |
| 329.103    | 2.484                                                  | 0.024                                                         | 308.467    | 2.512                                                  | 0.029                                                         | 298.603    | 3.463                                                  | 0.063                                                         |
| 328.478    | 2.484                                                  | 0.024                                                         | 307.742    | 2.563                                                  | 0.032                                                         | 298.317    | 3.270                                                  | 0.057                                                         |
| 327.852    | 2.484                                                  | 0.024                                                         | 307.458    | 2.537                                                  | 0.031                                                         | 298.031    | 3.238                                                  | 0.056                                                         |
| 327.228    | 2.484                                                  | 0.024                                                         | 307.172    | 2.526                                                  | 0.031                                                         | 297.746    | 3.130                                                  | 0.053                                                         |
| 326.602    | 2.484                                                  | 0.024                                                         | 306.886    | 2.526                                                  | 0.031                                                         | 297.460    | 3.136                                                  | 0.053                                                         |
| 325.976    | 2.486                                                  | 0.024                                                         | 306.601    | 2.523                                                  | 0.031                                                         | 297.175    | 3.118                                                  | 0.053                                                         |
| 325.351    | 2.486                                                  | 0.024                                                         | 306.315    | 2.524                                                  | 0.031                                                         | 296.889    | 3.078                                                  | 0.052                                                         |
| 324.726    | 2.487                                                  | 0.024                                                         | 306.030    | 2.521                                                  | 0.031                                                         | 296.603    | 3.064                                                  | 0.051                                                         |
| 324.101    | 2.484                                                  | 0.025                                                         | 305.744    | 2.526                                                  | 0.031                                                         | 296.318    | 3.025                                                  | 0.050                                                         |
| 323.475    | 2.487                                                  | 0.025                                                         | 305.458    | 2.524                                                  | 0.031                                                         | 296.032    | 3.003                                                  | 0.050                                                         |
| 322.850    | 2.487                                                  | 0.025                                                         | 305.173    | 2.532                                                  | 0.032                                                         | 295.747    | 2.992                                                  | 0.050                                                         |
| 322.224    | 2.487                                                  | 0.025                                                         | 304.887    | 2.535                                                  | 0.032                                                         | 295.461    | 2.975                                                  | 0.049                                                         |
| 321.599    | 2.488                                                  | 0.025                                                         | 304.601    | 2.540                                                  | 0.032                                                         | 295.175    | 2.953                                                  | 0.049                                                         |
| 320.974    | 2.488                                                  | 0.025                                                         | 304.316    | 2.544                                                  | 0.032                                                         | 294.889    | 2.942                                                  | 0.048                                                         |
| 320.349    | 2.487                                                  | 0.025                                                         | 304.030    | 2.539                                                  | 0.032                                                         | 294.604    | 2.928                                                  | 0.048                                                         |
| 319.723    | 2.488                                                  | 0.026                                                         | 303.744    | 2.542                                                  | 0.032                                                         | 294.318    | 2.936                                                  | 0.049                                                         |
| 319.097    | 2.490                                                  | 0.026                                                         | 303.459    | 2.545                                                  | 0.033                                                         | 294.032    | 2.909                                                  | 0.048                                                         |
| 318.472    | 2.491                                                  | 0.026                                                         | 303.173    | 2.542                                                  | 0.033                                                         | 293.747    | 2.889                                                  | 0.047                                                         |
| 317.847    | 2.492                                                  | 0.026                                                         | 302.888    | 2.543                                                  | 0.033                                                         |            |                                                        |                                                               |

**Table 2 A part of data of the isobaric heat capacity per unit volume at the critical composition and their uncertainties  $\delta C_p V^{-1}$  at different temperatures for  $\{(1-x_c) \text{1-pentanol} + x_c [\text{C}_8\text{mim}][\text{BF}_4]\}$  ( $T_c=291.455 \text{ K}$ )**

| $T$<br>(K) | $C_p V^{-1}$<br>(J·cm <sup>-3</sup> ·K <sup>-1</sup> ) | $\delta C_p V^{-1}$<br>(J·cm <sup>-3</sup> ·K <sup>-1</sup> ) | $T$<br>(K) | $C_p V^{-1}$<br>(J·cm <sup>-3</sup> ·K <sup>-1</sup> ) | $\delta C_p V^{-1}$<br>(J·cm <sup>-3</sup> ·K <sup>-1</sup> ) | $T$<br>(K) | $C_p V^{-1}$<br>(J·cm <sup>-3</sup> ·K <sup>-1</sup> ) | $\delta C_p V^{-1}$<br>(J·cm <sup>-3</sup> ·K <sup>-1</sup> ) |
|------------|--------------------------------------------------------|---------------------------------------------------------------|------------|--------------------------------------------------------|---------------------------------------------------------------|------------|--------------------------------------------------------|---------------------------------------------------------------|
| 329.371    | 2.114                                                  | 0.015                                                         | 308.727    | 2.070                                                  | 0.016                                                         | 294.407    | 2.063                                                  | 0.021                                                         |
| 328.740    | 2.112                                                  | 0.015                                                         | 308.101    | 2.068                                                  | 0.016                                                         | 294.141    | 2.054                                                  | 0.021                                                         |
| 328.114    | 2.109                                                  | 0.015                                                         | 307.476    | 2.066                                                  | 0.016                                                         | 293.876    | 2.056                                                  | 0.021                                                         |
| 327.488    | 2.108                                                  | 0.015                                                         | 306.851    | 2.065                                                  | 0.017                                                         | 293.611    | 2.068                                                  | 0.021                                                         |
| 326.863    | 2.107                                                  | 0.015                                                         | 306.225    | 2.064                                                  | 0.017                                                         | 293.345    | 2.060                                                  | 0.021                                                         |
| 326.237    | 2.106                                                  | 0.015                                                         | 305.601    | 2.063                                                  | 0.017                                                         | 293.080    | 2.061                                                  | 0.021                                                         |
| 325.612    | 2.104                                                  | 0.015                                                         | 304.974    | 2.062                                                  | 0.017                                                         | 292.815    | 2.075                                                  | 0.022                                                         |
| 324.986    | 2.102                                                  | 0.015                                                         | 304.349    | 2.060                                                  | 0.017                                                         | 292.550    | 2.074                                                  | 0.022                                                         |
| 324.361    | 2.101                                                  | 0.015                                                         | 303.724    | 2.060                                                  | 0.017                                                         | 292.284    | 2.075                                                  | 0.022                                                         |
| 323.736    | 2.100                                                  | 0.015                                                         | 303.099    | 2.059                                                  | 0.017                                                         | 292.019    | 2.075                                                  | 0.022                                                         |
| 323.110    | 2.098                                                  | 0.015                                                         | 302.474    | 2.057                                                  | 0.017                                                         | 291.754    | 2.103                                                  | 0.023                                                         |
| 322.485    | 2.097                                                  | 0.015                                                         | 301.848    | 2.058                                                  | 0.017                                                         | 291.488    | 2.141                                                  | 0.024                                                         |
| 321.860    | 2.096                                                  | 0.015                                                         | 301.223    | 2.056                                                  | 0.017                                                         | 291.223    | 2.281                                                  | 0.028                                                         |
| 321.234    | 2.095                                                  | 0.015                                                         | 300.598    | 2.055                                                  | 0.017                                                         | 290.957    | 2.217                                                  | 0.026                                                         |
| 320.609    | 2.093                                                  | 0.015                                                         | 299.972    | 2.054                                                  | 0.017                                                         | 290.692    | 2.234                                                  | 0.027                                                         |
| 319.983    | 2.092                                                  | 0.015                                                         | 299.173    | 2.069                                                  | 0.017                                                         | 290.427    | 2.203                                                  | 0.026                                                         |
| 319.358    | 2.091                                                  | 0.015                                                         | 298.918    | 2.063                                                  | 0.020                                                         | 290.161    | 2.196                                                  | 0.026                                                         |
| 318.733    | 2.089                                                  | 0.015                                                         | 298.653    | 2.051                                                  | 0.020                                                         | 289.896    | 2.180                                                  | 0.025                                                         |
| 318.107    | 2.088                                                  | 0.015                                                         | 298.388    | 2.053                                                  | 0.020                                                         | 289.630    | 2.166                                                  | 0.025                                                         |
| 317.482    | 2.087                                                  | 0.015                                                         | 298.122    | 2.046                                                  | 0.020                                                         | 289.365    | 2.158                                                  | 0.025                                                         |
| 316.857    | 2.085                                                  | 0.016                                                         | 297.857    | 2.057                                                  | 0.020                                                         | 289.100    | 2.163                                                  | 0.025                                                         |
| 316.231    | 2.084                                                  | 0.016                                                         | 297.592    | 2.062                                                  | 0.020                                                         | 288.835    | 2.144                                                  | 0.024                                                         |
| 315.606    | 2.083                                                  | 0.016                                                         | 297.326    | 2.053                                                  | 0.020                                                         | 288.569    | 2.161                                                  | 0.025                                                         |
| 314.981    | 2.082                                                  | 0.016                                                         | 297.060    | 2.052                                                  | 0.020                                                         | 288.304    | 2.129                                                  | 0.024                                                         |
| 314.355    | 2.080                                                  | 0.016                                                         | 296.795    | 2.057                                                  | 0.020                                                         | 288.039    | 2.140                                                  | 0.025                                                         |
| 313.730    | 2.079                                                  | 0.016                                                         | 296.530    | 2.055                                                  | 0.020                                                         | 287.773    | 2.116                                                  | 0.024                                                         |
| 313.105    | 2.076                                                  | 0.016                                                         | 296.265    | 2.053                                                  | 0.020                                                         | 287.508    | 2.129                                                  | 0.024                                                         |
| 312.479    | 2.077                                                  | 0.016                                                         | 295.999    | 2.040                                                  | 0.020                                                         | 287.243    | 2.118                                                  | 0.024                                                         |
| 311.854    | 2.075                                                  | 0.016                                                         | 295.734    | 2.055                                                  | 0.020                                                         | 286.977    | 2.102                                                  | 0.023                                                         |
| 311.228    | 2.075                                                  | 0.016                                                         | 295.469    | 2.046                                                  | 0.020                                                         | 286.711    | 2.104                                                  | 0.024                                                         |
| 310.603    | 2.073                                                  | 0.016                                                         | 295.203    | 2.053                                                  | 0.020                                                         | 286.446    | 2.103                                                  | 0.024                                                         |
| 309.977    | 2.071                                                  | 0.016                                                         | 294.937    | 2.050                                                  | 0.020                                                         | 286.181    | 2.100                                                  | 0.024                                                         |
| 309.352    | 2.070                                                  | 0.016                                                         | 294.672    | 2.055                                                  | 0.021                                                         |            |                                                        |                                                               |

**Table 3 A part of data of the isobaric heat capacity per unit volume at the critical composition and their uncertainties  $\delta C_p V^{-1}$  at different temperatures for  $\{(1-x_c) \text{ 2-pentanol} + x_c [\text{C}_8\text{mim}][\text{BF}_4]\}$  ( $T_c=295.101 \text{ K}$ )**

| $T$<br>(K) | $C_p V^{-1}$<br>(J·cm <sup>-3</sup> ·K <sup>-1</sup> ) | $\delta C_p V^{-1}$<br>(J·cm <sup>-3</sup> ·K <sup>-1</sup> ) | $T$<br>(K) | $C_p V^{-1}$<br>(J·cm <sup>-3</sup> ·K <sup>-1</sup> ) | $\delta C_p V^{-1}$<br>(J·cm <sup>-3</sup> ·K <sup>-1</sup> ) | $T$<br>(K) | $C_p V^{-1}$<br>(J·cm <sup>-3</sup> ·K <sup>-1</sup> ) | $\delta C_p V^{-1}$<br>(J·cm <sup>-3</sup> ·K <sup>-1</sup> ) |
|------------|--------------------------------------------------------|---------------------------------------------------------------|------------|--------------------------------------------------------|---------------------------------------------------------------|------------|--------------------------------------------------------|---------------------------------------------------------------|
| 333.808    | 2.252                                                  | 0.018                                                         | 313.164    | 2.224                                                  | 0.020                                                         | 298.917    | 2.210                                                  | 0.024                                                         |
| 333.179    | 2.257                                                  | 0.018                                                         | 312.540    | 2.222                                                  | 0.020                                                         | 298.653    | 2.204                                                  | 0.024                                                         |
| 332.552    | 2.258                                                  | 0.018                                                         | 311.914    | 2.220                                                  | 0.020                                                         | 298.387    | 2.205                                                  | 0.024                                                         |
| 331.927    | 2.260                                                  | 0.018                                                         | 311.290    | 2.215                                                  | 0.020                                                         | 298.121    | 2.205                                                  | 0.024                                                         |
| 331.301    | 2.259                                                  | 0.018                                                         | 310.664    | 2.217                                                  | 0.020                                                         | 297.856    | 2.207                                                  | 0.024                                                         |
| 330.675    | 2.258                                                  | 0.018                                                         | 310.038    | 2.217                                                  | 0.020                                                         | 297.591    | 2.212                                                  | 0.025                                                         |
| 330.050    | 2.255                                                  | 0.018                                                         | 309.414    | 2.214                                                  | 0.020                                                         | 297.325    | 2.214                                                  | 0.025                                                         |
| 329.425    | 2.255                                                  | 0.018                                                         | 308.787    | 2.213                                                  | 0.020                                                         | 297.060    | 2.209                                                  | 0.025                                                         |
| 328.799    | 2.251                                                  | 0.018                                                         | 308.163    | 2.213                                                  | 0.021                                                         | 296.794    | 2.210                                                  | 0.025                                                         |
| 328.173    | 2.251                                                  | 0.018                                                         | 307.537    | 2.211                                                  | 0.021                                                         | 296.530    | 2.215                                                  | 0.025                                                         |
| 327.549    | 2.252                                                  | 0.018                                                         | 306.912    | 2.211                                                  | 0.021                                                         | 296.264    | 2.223                                                  | 0.025                                                         |
| 326.923    | 2.249                                                  | 0.018                                                         | 306.286    | 2.208                                                  | 0.021                                                         | 295.998    | 2.225                                                  | 0.025                                                         |
| 326.298    | 2.250                                                  | 0.018                                                         | 305.661    | 2.209                                                  | 0.021                                                         | 295.734    | 2.233                                                  | 0.026                                                         |
| 325.673    | 2.249                                                  | 0.018                                                         | 305.036    | 2.205                                                  | 0.021                                                         | 295.468    | 2.242                                                  | 0.026                                                         |
| 325.047    | 2.249                                                  | 0.019                                                         | 304.410    | 2.206                                                  | 0.021                                                         | 295.202    | 2.265                                                  | 0.026                                                         |
| 324.422    | 2.245                                                  | 0.019                                                         | 303.692    | 2.219                                                  | 0.024                                                         | 294.937    | 2.465                                                  | 0.033                                                         |
| 323.796    | 2.244                                                  | 0.019                                                         | 303.429    | 2.212                                                  | 0.023                                                         | 294.672    | 2.410                                                  | 0.031                                                         |
| 323.172    | 2.242                                                  | 0.019                                                         | 303.163    | 2.212                                                  | 0.023                                                         | 294.407    | 2.410                                                  | 0.031                                                         |
| 322.546    | 2.239                                                  | 0.019                                                         | 302.898    | 2.206                                                  | 0.023                                                         | 294.141    | 2.370                                                  | 0.030                                                         |
| 321.920    | 2.241                                                  | 0.019                                                         | 302.633    | 2.201                                                  | 0.023                                                         | 293.876    | 2.358                                                  | 0.030                                                         |
| 321.295    | 2.239                                                  | 0.019                                                         | 302.368    | 2.206                                                  | 0.023                                                         | 293.610    | 2.355                                                  | 0.030                                                         |
| 320.669    | 2.238                                                  | 0.019                                                         | 302.102    | 2.204                                                  | 0.023                                                         | 293.345    | 2.326                                                  | 0.029                                                         |
| 320.045    | 2.238                                                  | 0.019                                                         | 301.837    | 2.202                                                  | 0.023                                                         | 293.079    | 2.346                                                  | 0.030                                                         |
| 319.419    | 2.235                                                  | 0.019                                                         | 301.571    | 2.198                                                  | 0.023                                                         | 292.814    | 2.299                                                  | 0.028                                                         |
| 318.794    | 2.235                                                  | 0.019                                                         | 301.306    | 2.209                                                  | 0.024                                                         | 292.548    | 2.345                                                  | 0.030                                                         |
| 318.168    | 2.232                                                  | 0.019                                                         | 301.041    | 2.204                                                  | 0.024                                                         | 292.284    | 2.279                                                  | 0.028                                                         |
| 317.542    | 2.234                                                  | 0.019                                                         | 300.775    | 2.204                                                  | 0.024                                                         | 292.018    | 2.313                                                  | 0.029                                                         |
| 316.918    | 2.232                                                  | 0.019                                                         | 300.510    | 2.203                                                  | 0.024                                                         | 291.753    | 2.282                                                  | 0.028                                                         |
| 316.292    | 2.229                                                  | 0.019                                                         | 300.244    | 2.203                                                  | 0.024                                                         | 291.487    | 2.295                                                  | 0.029                                                         |

|         |       |       |         |       |       |         |       |       |
|---------|-------|-------|---------|-------|-------|---------|-------|-------|
| 315.667 | 2.229 | 0.020 | 299.979 | 2.204 | 0.024 | 291.222 | 2.271 | 0.028 |
| 315.041 | 2.226 | 0.020 | 299.714 | 2.212 | 0.024 | 290.957 | 2.289 | 0.029 |
| 314.416 | 2.227 | 0.020 | 299.448 | 2.205 | 0.024 | 290.691 | 2.252 | 0.028 |
| 313.791 | 2.224 | 0.020 | 299.183 | 2.203 | 0.024 |         |       |       |

**Table 4 A part of data of the isobaric heat capacity per unit volume at the critical composition and their uncertainties  $\delta C_p V^{-1}$  at different temperatures for  $\{(1-x_c) \text{ 1-hexanol} + x_c [\text{C}_8\text{mim}][\text{BF}_4]\}$  ( $T_c=300.155 \text{ K}$ )**

| $T$<br>(K) | $C_p V^{-1}$<br>(J·cm <sup>-3</sup> ·K <sup>-1</sup> ) | $\delta C_p V^{-1}$<br>(J·cm <sup>-3</sup> ·K <sup>-1</sup> ) | $T$<br>(K) | $C_p V^{-1}$<br>(J·cm <sup>-3</sup> ·K <sup>-1</sup> ) | $\delta C_p V^{-1}$<br>(J·cm <sup>-3</sup> ·K <sup>-1</sup> ) | $T$<br>(K) | $C_p V^{-1}$<br>(J·cm <sup>-3</sup> ·K <sup>-1</sup> ) | $\delta C_p V^{-1}$<br>(J·cm <sup>-3</sup> ·K <sup>-1</sup> ) |
|------------|--------------------------------------------------------|---------------------------------------------------------------|------------|--------------------------------------------------------|---------------------------------------------------------------|------------|--------------------------------------------------------|---------------------------------------------------------------|
| 338.877    | 2.131                                                  | 0.014                                                         | 318.236    | 2.091                                                  | 0.016                                                         | 303.988    | 2.074                                                  | 0.020                                                         |
| 338.248    | 2.125                                                  | 0.014                                                         | 317.610    | 2.090                                                  | 0.016                                                         | 303.722    | 2.072                                                  | 0.020                                                         |
| 337.623    | 2.125                                                  | 0.014                                                         | 316.985    | 2.088                                                  | 0.016                                                         | 303.458    | 2.068                                                  | 0.020                                                         |
| 336.997    | 2.122                                                  | 0.014                                                         | 316.359    | 2.088                                                  | 0.016                                                         | 303.192    | 2.072                                                  | 0.020                                                         |
| 336.371    | 2.123                                                  | 0.014                                                         | 315.734    | 2.088                                                  | 0.016                                                         | 302.927    | 2.073                                                  | 0.020                                                         |
| 335.746    | 2.120                                                  | 0.014                                                         | 315.109    | 2.085                                                  | 0.016                                                         | 302.661    | 2.078                                                  | 0.020                                                         |
| 335.120    | 2.120                                                  | 0.014                                                         | 314.483    | 2.086                                                  | 0.016                                                         | 302.396    | 2.081                                                  | 0.020                                                         |
| 334.496    | 2.120                                                  | 0.014                                                         | 313.858    | 2.082                                                  | 0.016                                                         | 302.130    | 2.080                                                  | 0.020                                                         |
| 333.870    | 2.117                                                  | 0.014                                                         | 313.233    | 2.084                                                  | 0.016                                                         | 301.866    | 2.076                                                  | 0.020                                                         |
| 333.245    | 2.119                                                  | 0.014                                                         | 312.608    | 2.083                                                  | 0.016                                                         | 301.601    | 2.089                                                  | 0.021                                                         |
| 332.619    | 2.116                                                  | 0.014                                                         | 311.982    | 2.080                                                  | 0.016                                                         | 301.334    | 2.085                                                  | 0.020                                                         |
| 331.994    | 2.116                                                  | 0.014                                                         | 311.356    | 2.081                                                  | 0.016                                                         | 301.070    | 2.091                                                  | 0.021                                                         |
| 331.368    | 2.115                                                  | 0.015                                                         | 310.731    | 2.077                                                  | 0.016                                                         | 300.804    | 2.092                                                  | 0.021                                                         |
| 330.742    | 2.112                                                  | 0.014                                                         | 310.106    | 2.079                                                  | 0.016                                                         | 300.538    | 2.101                                                  | 0.021                                                         |
| 330.118    | 2.112                                                  | 0.015                                                         | 309.481    | 2.077                                                  | 0.016                                                         | 300.273    | 2.119                                                  | 0.022                                                         |
| 329.492    | 2.111                                                  | 0.015                                                         | 308.856    | 2.093                                                  | 0.020                                                         | 300.007    | 2.336                                                  | 0.028                                                         |
| 328.867    | 2.110                                                  | 0.015                                                         | 308.231    | 2.061                                                  | 0.019                                                         | 299.743    | 2.247                                                  | 0.025                                                         |
| 328.241    | 2.108                                                  | 0.015                                                         | 308.006    | 2.072                                                  | 0.019                                                         | 299.477    | 2.259                                                  | 0.026                                                         |
| 327.616    | 2.107                                                  | 0.015                                                         | 307.781    | 2.076                                                  | 0.019                                                         | 299.212    | 2.224                                                  | 0.025                                                         |
| 326.991    | 2.107                                                  | 0.015                                                         | 307.556    | 2.077                                                  | 0.019                                                         | 298.946    | 2.208                                                  | 0.024                                                         |
| 326.365    | 2.106                                                  | 0.015                                                         | 307.331    | 2.073                                                  | 0.019                                                         | 298.681    | 2.197                                                  | 0.024                                                         |
| 325.740    | 2.105                                                  | 0.015                                                         | 307.106    | 2.078                                                  | 0.019                                                         | 298.416    | 2.191                                                  | 0.024                                                         |
| 325.115    | 2.103                                                  | 0.015                                                         | 306.881    | 2.077                                                  | 0.019                                                         | 298.151    | 2.174                                                  | 0.023                                                         |
| 324.489    | 2.102                                                  | 0.015                                                         | 306.656    | 2.086                                                  | 0.020                                                         | 297.886    | 2.187                                                  | 0.024                                                         |

|         |       |       |         |       |       |         |       |       |
|---------|-------|-------|---------|-------|-------|---------|-------|-------|
| 323.864 | 2.101 | 0.015 | 306.376 | 2.069 | 0.019 | 297.620 | 2.142 | 0.023 |
| 323.238 | 2.100 | 0.015 | 306.111 | 2.074 | 0.019 | 297.355 | 2.181 | 0.024 |
| 322.614 | 2.100 | 0.015 | 305.845 | 2.072 | 0.019 | 297.090 | 2.137 | 0.023 |
| 321.988 | 2.098 | 0.015 | 305.581 | 2.086 | 0.020 | 296.823 | 2.171 | 0.024 |
| 321.362 | 2.096 | 0.015 | 305.315 | 2.069 | 0.019 | 296.558 | 2.122 | 0.022 |
| 320.738 | 2.096 | 0.015 | 305.049 | 2.083 | 0.020 | 296.293 | 2.152 | 0.023 |
| 320.111 | 2.094 | 0.015 | 304.785 | 2.072 | 0.020 | 296.028 | 2.120 | 0.022 |
| 319.487 | 2.093 | 0.015 | 304.519 | 2.071 | 0.020 | 295.762 | 2.130 | 0.023 |
| 318.861 | 2.092 | 0.015 | 304.254 | 2.075 | 0.020 |         |       |       |

**Table 5 A part of data of the isobaric heat capacity per unit volume at the critical composition and their uncertainties  $\delta C_p V^{-1}$  at different temperatures for  $\{(1-x_c)$  1-heptanol +  $x_c$  [C<sub>8</sub>mim][BF<sub>4</sub>] $\}$  ( $T_c=307.523$  K)**

| $T$<br>(K) | $C_p V^{-1}$<br>(J·cm <sup>-3</sup> ·K <sup>-1</sup> ) | $\delta C_p V^{-1}$<br>(J·cm <sup>-3</sup> ·K <sup>-1</sup> ) | $T$<br>(K) | $C_p V^{-1}$<br>(J·cm <sup>-3</sup> ·K <sup>-1</sup> ) | $\delta C_p V^{-1}$<br>(J·cm <sup>-3</sup> ·K <sup>-1</sup> ) | $T$<br>(K) | $C_p V^{-1}$<br>(J·cm <sup>-3</sup> ·K <sup>-1</sup> ) | $\delta C_p V^{-1}$<br>(J·cm <sup>-3</sup> ·K <sup>-1</sup> ) |
|------------|--------------------------------------------------------|---------------------------------------------------------------|------------|--------------------------------------------------------|---------------------------------------------------------------|------------|--------------------------------------------------------|---------------------------------------------------------------|
| 346.255    | 2.121                                                  | 0.013                                                         | 315.818    | 2.079                                                  | 0.018                                                         | 315.876    | 2.101                                                  | 0.019                                                         |
| 345.314    | 2.119                                                  | 0.013                                                         | 315.420    | 2.090                                                  | 0.019                                                         | 315.478    | 2.091                                                  | 0.019                                                         |
| 344.376    | 2.122                                                  | 0.013                                                         | 315.021    | 2.090                                                  | 0.019                                                         | 315.081    | 2.089                                                  | 0.019                                                         |
| 343.438    | 2.124                                                  | 0.013                                                         | 314.624    | 2.071                                                  | 0.018                                                         | 314.683    | 2.089                                                  | 0.019                                                         |
| 342.500    | 2.127                                                  | 0.014                                                         | 314.226    | 2.077                                                  | 0.018                                                         | 314.284    | 2.092                                                  | 0.019                                                         |
| 341.562    | 2.124                                                  | 0.014                                                         | 313.827    | 2.091                                                  | 0.019                                                         | 313.886    | 2.093                                                  | 0.019                                                         |
| 340.625    | 2.128                                                  | 0.014                                                         | 313.430    | 2.098                                                  | 0.019                                                         | 313.488    | 2.092                                                  | 0.019                                                         |
| 339.686    | 2.127                                                  | 0.014                                                         | 313.032    | 2.095                                                  | 0.019                                                         | 313.089    | 2.087                                                  | 0.019                                                         |
| 338.748    | 2.127                                                  | 0.014                                                         | 312.634    | 2.084                                                  | 0.019                                                         | 312.692    | 2.095                                                  | 0.019                                                         |
| 337.809    | 2.126                                                  | 0.014                                                         | 312.236    | 2.080                                                  | 0.019                                                         | 312.295    | 2.090                                                  | 0.019                                                         |
| 336.872    | 2.124                                                  | 0.014                                                         | 311.837    | 2.104                                                  | 0.019                                                         | 311.896    | 2.091                                                  | 0.019                                                         |
| 335.933    | 2.122                                                  | 0.014                                                         | 311.440    | 2.102                                                  | 0.019                                                         | 311.497    | 2.090                                                  | 0.019                                                         |
| 334.996    | 2.123                                                  | 0.014                                                         | 311.041    | 2.094                                                  | 0.019                                                         | 311.099    | 2.091                                                  | 0.019                                                         |
| 334.057    | 2.119                                                  | 0.014                                                         | 310.643    | 2.096                                                  | 0.019                                                         | 310.702    | 2.094                                                  | 0.019                                                         |
| 333.119    | 2.118                                                  | 0.014                                                         | 310.245    | 2.084                                                  | 0.019                                                         | 310.304    | 2.093                                                  | 0.019                                                         |
| 332.181    | 2.117                                                  | 0.014                                                         | 309.847    | 2.099                                                  | 0.019                                                         | 309.906    | 2.094                                                  | 0.019                                                         |
| 331.243    | 2.117                                                  | 0.015                                                         | 309.449    | 2.098                                                  | 0.020                                                         | 309.507    | 2.099                                                  | 0.020                                                         |
| 330.305    | 2.114                                                  | 0.015                                                         | 309.051    | 2.093                                                  | 0.019                                                         | 309.110    | 2.102                                                  | 0.019                                                         |
| 329.368    | 2.108                                                  | 0.015                                                         | 308.654    | 2.119                                                  | 0.020                                                         | 308.712    | 2.107                                                  | 0.020                                                         |

|         |       |       |         |       |       |         |       |       |
|---------|-------|-------|---------|-------|-------|---------|-------|-------|
| 328.429 | 2.115 | 0.015 | 308.255 | 2.099 | 0.020 | 308.314 | 2.107 | 0.020 |
| 327.491 | 2.111 | 0.015 | 307.857 | 2.130 | 0.020 | 307.916 | 2.117 | 0.020 |
| 326.553 | 2.107 | 0.015 | 307.460 | 2.357 | 0.025 | 307.517 | 2.268 | 0.024 |
| 325.615 | 2.105 | 0.015 | 307.061 | 2.259 | 0.024 | 307.119 | 2.237 | 0.023 |
| 324.677 | 2.105 | 0.015 | 306.663 | 2.211 | 0.023 | 306.721 | 2.244 | 0.024 |
| 323.739 | 2.104 | 0.015 | 306.265 | 2.211 | 0.023 | 306.324 | 2.225 | 0.023 |
| 322.800 | 2.102 | 0.015 | 305.867 | 2.220 | 0.023 | 305.925 | 2.210 | 0.023 |
| 321.863 | 2.100 | 0.015 | 305.469 | 2.209 | 0.023 | 305.527 | 2.190 | 0.022 |
| 320.924 | 2.101 | 0.015 | 305.071 | 2.188 | 0.022 | 305.129 | 2.183 | 0.022 |
| 319.987 | 2.100 | 0.015 | 304.673 | 2.162 | 0.022 | 304.731 | 2.188 | 0.022 |
| 319.049 | 2.097 | 0.016 | 304.275 | 2.192 | 0.023 | 304.333 | 2.173 | 0.022 |
| 318.110 | 2.096 | 0.016 | 303.876 | 2.142 | 0.021 | 303.935 | 2.152 | 0.022 |
| 317.172 | 2.095 | 0.016 | 303.479 | 2.127 | 0.021 | 303.537 | 2.139 | 0.021 |
| 316.216 | 2.128 | 0.019 | 316.272 | 2.096 | 0.019 |         |       |       |

**Table 6 A part of data of the isobaric heat capacity per unit volume at the critical composition and their uncertainties  $\delta C_p V^{-1}$  at different temperatures for  $\{(1-x_c) \text{ 1-propanol} + x_c [\text{C}_8\text{mim}][\text{PF}_6]\}$  ( $T_c=307.877 \text{ K}$ )**

| $T$<br>(K) | $C_p V^{-1}$<br>( $\text{J}\cdot\text{cm}^{-3}\cdot\text{K}^{-1}$ ) | $\delta C_p V^{-1}$<br>( $\text{J}\cdot\text{cm}^{-3}\cdot\text{K}^{-1}$ ) | $T$<br>(K) | $C_p V^{-1}$<br>( $\text{J}\cdot\text{cm}^{-3}\cdot\text{K}^{-1}$ ) | $\delta C_p V^{-1}$<br>( $\text{J}\cdot\text{cm}^{-3}\cdot\text{K}^{-1}$ ) | $T$<br>(K) | $C_p V^{-1}$<br>( $\text{J}\cdot\text{cm}^{-3}\cdot\text{K}^{-1}$ ) | $\delta C_p V^{-1}$<br>( $\text{J}\cdot\text{cm}^{-3}\cdot\text{K}^{-1}$ ) |
|------------|---------------------------------------------------------------------|----------------------------------------------------------------------------|------------|---------------------------------------------------------------------|----------------------------------------------------------------------------|------------|---------------------------------------------------------------------|----------------------------------------------------------------------------|
| 347.245    | 2.226                                                               | 0.017                                                                      | 326.599    | 2.179                                                               | 0.017                                                                      | 312.207    | 2.173                                                               | 0.021                                                                      |
| 346.612    | 2.217                                                               | 0.015                                                                      | 325.973    | 2.178                                                               | 0.017                                                                      | 311.942    | 2.178                                                               | 0.021                                                                      |
| 345.985    | 2.214                                                               | 0.015                                                                      | 325.348    | 2.177                                                               | 0.017                                                                      | 311.677    | 2.174                                                               | 0.021                                                                      |
| 345.360    | 2.212                                                               | 0.015                                                                      | 324.722    | 2.177                                                               | 0.017                                                                      | 311.411    | 2.183                                                               | 0.021                                                                      |
| 344.735    | 2.210                                                               | 0.015                                                                      | 324.098    | 2.177                                                               | 0.017                                                                      | 311.146    | 2.178                                                               | 0.021                                                                      |
| 344.109    | 2.207                                                               | 0.015                                                                      | 323.472    | 2.176                                                               | 0.017                                                                      | 310.880    | 2.186                                                               | 0.021                                                                      |
| 343.484    | 2.205                                                               | 0.015                                                                      | 322.846    | 2.173                                                               | 0.017                                                                      | 310.615    | 2.183                                                               | 0.021                                                                      |
| 342.858    | 2.203                                                               | 0.015                                                                      | 322.221    | 2.174                                                               | 0.017                                                                      | 310.350    | 2.198                                                               | 0.022                                                                      |
| 342.232    | 2.203                                                               | 0.015                                                                      | 321.596    | 2.172                                                               | 0.017                                                                      | 310.084    | 2.190                                                               | 0.022                                                                      |
| 341.608    | 2.200                                                               | 0.015                                                                      | 320.970    | 2.173                                                               | 0.017                                                                      | 309.819    | 2.190                                                               | 0.022                                                                      |
| 340.982    | 2.199                                                               | 0.015                                                                      | 320.345    | 2.172                                                               | 0.017                                                                      | 309.554    | 2.185                                                               | 0.022                                                                      |
| 340.357    | 2.198                                                               | 0.015                                                                      | 319.720    | 2.172                                                               | 0.017                                                                      | 309.288    | 2.198                                                               | 0.022                                                                      |
| 339.731    | 2.198                                                               | 0.015                                                                      | 319.095    | 2.172                                                               | 0.017                                                                      | 309.023    | 2.195                                                               | 0.022                                                                      |
| 339.106    | 2.196                                                               | 0.015                                                                      | 318.469    | 2.171                                                               | 0.018                                                                      | 308.757    | 2.215                                                               | 0.023                                                                      |

|         |       |       |         |       |       |         |       |       |
|---------|-------|-------|---------|-------|-------|---------|-------|-------|
| 338.480 | 2.194 | 0.015 | 317.844 | 2.170 | 0.018 | 308.492 | 2.221 | 0.023 |
| 337.855 | 2.194 | 0.016 | 317.218 | 2.170 | 0.018 | 308.226 | 2.227 | 0.023 |
| 337.230 | 2.191 | 0.016 | 316.718 | 2.305 | 0.023 | 307.961 | 2.271 | 0.024 |
| 336.605 | 2.191 | 0.016 | 316.453 | 2.169 | 0.020 | 307.696 | 2.453 | 0.029 |
| 335.979 | 2.190 | 0.016 | 316.187 | 2.179 | 0.021 | 307.431 | 2.429 | 0.028 |
| 335.354 | 2.190 | 0.016 | 315.922 | 2.182 | 0.021 | 307.165 | 2.388 | 0.027 |
| 334.728 | 2.188 | 0.016 | 315.657 | 2.168 | 0.020 | 306.900 | 2.365 | 0.027 |
| 334.103 | 2.187 | 0.016 | 315.392 | 2.176 | 0.021 | 306.635 | 2.366 | 0.027 |
| 333.477 | 2.186 | 0.016 | 315.126 | 2.173 | 0.020 | 306.369 | 2.355 | 0.027 |
| 332.852 | 2.185 | 0.016 | 314.861 | 2.183 | 0.021 | 306.104 | 2.350 | 0.027 |
| 332.227 | 2.184 | 0.016 | 314.595 | 2.176 | 0.021 | 305.839 | 2.336 | 0.026 |
| 331.601 | 2.184 | 0.016 | 314.330 | 2.167 | 0.020 | 305.573 | 2.321 | 0.026 |
| 330.977 | 2.184 | 0.016 | 314.065 | 2.177 | 0.021 | 305.308 | 2.312 | 0.026 |
| 330.350 | 2.184 | 0.016 | 313.799 | 2.181 | 0.021 | 305.043 | 2.305 | 0.026 |
| 329.725 | 2.183 | 0.016 | 313.534 | 2.176 | 0.021 | 304.777 | 2.304 | 0.026 |
| 329.100 | 2.181 | 0.016 | 313.268 | 2.175 | 0.021 | 304.512 | 2.293 | 0.025 |
| 328.475 | 2.180 | 0.016 | 313.003 | 2.175 | 0.021 | 304.246 | 2.280 | 0.025 |
| 327.849 | 2.181 | 0.016 | 312.737 | 2.180 | 0.021 | 303.981 | 2.280 | 0.025 |
| 327.224 | 2.180 | 0.017 | 312.473 | 2.163 | 0.020 |         |       |       |

**Table 7 A part of data of the specific heat capacity and the isobaric heat capacity per unit volume at the critical composition and their uncertainties  $\delta c_{p,s}$  and  $\delta C_p V^{-1}$  at different temperatures for  $\{(1-x_c)$  1-butanol+  $x_c$  [C<sub>8</sub>mim][PF<sub>6</sub>]} ( $T_c=326.524$  K)**

| $T$<br>(K) | $c_{p,s}$<br>(J·g <sup>-1</sup> ·K <sup>-1</sup> ) | $\delta c_{p,s}$<br>(J·g <sup>-1</sup> ·K <sup>-1</sup> ) | $C_p V^{-1}$<br>(J·cm <sup>-3</sup> ·K <sup>-1</sup> ) | $\delta C_p V^{-1}$<br>(J·cm <sup>-3</sup> ·K <sup>-1</sup> ) |
|------------|----------------------------------------------------|-----------------------------------------------------------|--------------------------------------------------------|---------------------------------------------------------------|
| 348.148    | 2.590                                              | 0.017                                                     | 2.246                                                  | 0.016                                                         |
| 347.817    | 2.595                                              | 0.016                                                     | 2.252                                                  | 0.016                                                         |
| 347.490    | 2.595                                              | 0.016                                                     | 2.252                                                  | 0.016                                                         |
| 347.165    | 2.591                                              | 0.017                                                     | 2.250                                                  | 0.016                                                         |
| 346.841    | 2.593                                              | 0.016                                                     | 2.252                                                  | 0.016                                                         |
| 346.514    | 2.592                                              | 0.016                                                     | 2.252                                                  | 0.016                                                         |
| 346.189    | 2.590                                              | 0.016                                                     | 2.251                                                  | 0.016                                                         |
| 345.866    | 2.590                                              | 0.016                                                     | 2.252                                                  | 0.016                                                         |
| 345.539    | 2.589                                              | 0.016                                                     | 2.251                                                  | 0.016                                                         |
| 345.213    | 2.588                                              | 0.016                                                     | 2.251                                                  | 0.016                                                         |
| 344.890    | 2.586                                              | 0.016                                                     | 2.250                                                  | 0.016                                                         |
| 344.564    | 2.585                                              | 0.016                                                     | 2.250                                                  | 0.016                                                         |
| 344.237    | 2.584                                              | 0.016                                                     | 2.250                                                  | 0.016                                                         |



|         |       |       |       |       |
|---------|-------|-------|-------|-------|
| 343.910 | 2.581 | 0.016 | 2.248 | 0.016 |
| 343.588 | 2.578 | 0.016 | 2.246 | 0.016 |
| 343.261 | 2.579 | 0.016 | 2.248 | 0.016 |
| 342.935 | 2.577 | 0.016 | 2.247 | 0.016 |
| 342.612 | 2.575 | 0.016 | 2.246 | 0.016 |
| 342.284 | 2.573 | 0.016 | 2.245 | 0.016 |
| 341.960 | 2.577 | 0.016 | 2.249 | 0.016 |
| 341.632 | 2.577 | 0.016 | 2.250 | 0.016 |
| 341.308 | 2.574 | 0.016 | 2.248 | 0.016 |
| 341.008 | 2.572 | 0.016 | 2.247 | 0.016 |
| 340.659 | 2.571 | 0.016 | 2.247 | 0.016 |
| 340.334 | 2.572 | 0.016 | 2.248 | 0.016 |
| 340.007 | 2.564 | 0.016 | 2.242 | 0.016 |
| 339.682 | 2.565 | 0.016 | 2.244 | 0.016 |
| 339.358 | 2.561 | 0.017 | 2.241 | 0.016 |
| 339.031 | 2.563 | 0.016 | 2.243 | 0.016 |
| 338.706 | 2.565 | 0.016 | 2.246 | 0.016 |
| 338.379 | 2.563 | 0.016 | 2.244 | 0.016 |
| 338.057 | 2.560 | 0.016 | 2.243 | 0.016 |
| 337.732 | 2.561 | 0.016 | 2.245 | 0.016 |
| 337.403 | 2.560 | 0.016 | 2.245 | 0.016 |
| 337.079 | 2.555 | 0.016 | 2.241 | 0.016 |
| 336.758 | 2.546 | 0.017 | 2.234 | 0.016 |
| 336.427 | 2.549 | 0.017 | 2.237 | 0.016 |
| 336.101 | 2.549 | 0.017 | 2.238 | 0.016 |
| 335.778 | 2.547 | 0.017 | 2.237 | 0.016 |
| 335.453 | 2.549 | 0.017 | 2.239 | 0.016 |
| 335.127 | 2.550 | 0.016 | 2.241 | 0.016 |
| 334.800 | 2.552 | 0.016 | 2.243 | 0.016 |
| 334.476 | 2.549 | 0.016 | 2.241 | 0.016 |
| 334.155 | 2.548 | 0.016 | 2.241 | 0.016 |
| 333.836 | 2.546 | 0.016 | 2.240 | 0.016 |
| 333.505 | 2.546 | 0.016 | 2.240 | 0.016 |
| 333.176 | 2.545 | 0.016 | 2.240 | 0.016 |
| 332.848 | 2.542 | 0.016 | 2.239 | 0.016 |
| 332.527 | 2.541 | 0.016 | 2.239 | 0.016 |
| 332.199 | 2.540 | 0.016 | 2.239 | 0.016 |
| 331.873 | 2.541 | 0.016 | 2.240 | 0.016 |
| 331.548 | 2.540 | 0.016 | 2.239 | 0.016 |
| 331.222 | 2.543 | 0.016 | 2.243 | 0.016 |
| 330.898 | 2.542 | 0.016 | 2.243 | 0.016 |
| 330.572 | 2.542 | 0.016 | 2.244 | 0.016 |
| 330.253 | 2.542 | 0.016 | 2.244 | 0.016 |
| 329.924 | 2.542 | 0.016 | 2.244 | 0.016 |

|         |       |       |       |       |
|---------|-------|-------|-------|-------|
| 329.595 | 2.542 | 0.016 | 2.246 | 0.016 |
| 329.277 | 2.542 | 0.016 | 2.247 | 0.016 |
| 328.946 | 2.545 | 0.016 | 2.249 | 0.016 |
| 328.619 | 2.546 | 0.016 | 2.251 | 0.016 |
| 328.293 | 2.551 | 0.016 | 2.257 | 0.016 |
| 327.970 | 2.561 | 0.016 | 2.266 | 0.015 |
| 327.646 | 2.556 | 0.016 | 2.262 | 0.015 |
| 327.319 | 2.561 | 0.016 | 2.267 | 0.015 |
| 326.994 | 2.576 | 0.016 | 2.281 | 0.015 |
| 326.670 | 2.600 | 0.015 | 2.303 | 0.015 |
| 326.343 | 2.875 | 0.013 | 2.548 | 0.013 |
| 326.019 | 2.793 | 0.014 | 2.475 | 0.014 |
| 325.694 | 2.747 | 0.014 | 2.436 | 0.014 |
| 325.366 | 2.734 | 0.014 | 2.425 | 0.014 |
| 325.042 | 2.720 | 0.014 | 2.413 | 0.014 |
| 324.716 | 2.683 | 0.014 | 2.381 | 0.014 |
| 324.391 | 2.682 | 0.014 | 2.381 | 0.014 |
| 324.065 | 2.681 | 0.014 | 2.381 | 0.014 |
| 323.740 | 2.660 | 0.015 | 2.363 | 0.014 |
| 323.415 | 2.649 | 0.015 | 2.354 | 0.014 |
| 323.088 | 2.637 | 0.015 | 2.344 | 0.015 |
| 322.772 | 2.626 | 0.015 | 2.335 | 0.015 |
| 322.438 | 2.618 | 0.015 | 2.328 | 0.015 |
| 322.116 | 2.607 | 0.015 | 2.319 | 0.015 |
| 321.791 | 2.597 | 0.015 | 2.311 | 0.015 |
| 321.462 | 2.590 | 0.015 | 2.306 | 0.015 |
| 321.136 | 2.580 | 0.015 | 2.297 | 0.015 |
| 320.816 | 2.573 | 0.015 | 2.292 | 0.015 |
| 320.487 | 2.566 | 0.016 | 2.286 | 0.015 |
| 320.160 | 2.560 | 0.016 | 2.282 | 0.015 |
| 319.835 | 2.553 | 0.016 | 2.276 | 0.015 |
| 319.512 | 2.548 | 0.016 | 2.273 | 0.015 |
| 319.186 | 2.541 | 0.016 | 2.267 | 0.015 |
| 318.862 | 2.535 | 0.016 | 2.262 | 0.015 |
| 318.539 | 2.529 | 0.016 | 2.258 | 0.016 |
| 318.207 | 2.523 | 0.016 | 2.253 | 0.016 |
| 317.883 | 2.518 | 0.016 | 2.249 | 0.016 |
| 317.558 | 2.513 | 0.016 | 2.245 | 0.016 |
| 317.233 | 2.507 | 0.016 | 2.240 | 0.016 |
| 316.904 | 2.502 | 0.016 | 2.237 | 0.016 |
| 316.583 | 2.498 | 0.016 | 2.234 | 0.016 |
| 316.257 | 2.493 | 0.016 | 2.230 | 0.016 |
| 315.930 | 2.487 | 0.017 | 2.225 | 0.016 |
| 315.610 | 2.480 | 0.017 | 2.220 | 0.016 |

|         |       |       |       |       |
|---------|-------|-------|-------|-------|
| 315.283 | 2.477 | 0.017 | 2.218 | 0.016 |
| 314.957 | 2.474 | 0.017 | 2.216 | 0.016 |
| 314.630 | 2.465 | 0.017 | 2.208 | 0.016 |
| 314.304 | 2.459 | 0.017 | 2.203 | 0.016 |

**Table 8 A part of data of the specific heat capacity and the isobaric heat capacity per unit volume at the critical composition and their uncertainties  $\delta c_{p,s}$  and  $\delta C_p V^{-1}$  at different temperatures for  $\{(1-x_c)$  2-butanol+  $x_c$  [C<sub>8</sub>mim][PF<sub>6</sub>]} ( $T_c=325.059$  K)**

| $T$<br>(K) | $c_{p,s}$<br>(J·g <sup>-1</sup> ·K <sup>-1</sup> ) | $\delta c_{p,s}$<br>(J·g <sup>-1</sup> ·K <sup>-1</sup> ) | $C_p V^{-1}$<br>(J·cm <sup>-3</sup> ·K <sup>-1</sup> ) | $\delta C_p V^{-1}$<br>(J·cm <sup>-3</sup> ·K <sup>-1</sup> ) |
|------------|----------------------------------------------------|-----------------------------------------------------------|--------------------------------------------------------|---------------------------------------------------------------|
| 348.151    | 2.803                                              | 0.011                                                     | 2.256                                                  | 0.011                                                         |
| 347.826    | 2.806                                              | 0.011                                                     | 2.259                                                  | 0.011                                                         |
| 347.501    | 2.806                                              | 0.011                                                     | 2.259                                                  | 0.011                                                         |
| 347.175    | 2.806                                              | 0.011                                                     | 2.260                                                  | 0.011                                                         |
| 346.850    | 2.805                                              | 0.011                                                     | 2.260                                                  | 0.011                                                         |
| 346.528    | 2.803                                              | 0.011                                                     | 2.259                                                  | 0.011                                                         |
| 346.200    | 2.802                                              | 0.011                                                     | 2.259                                                  | 0.011                                                         |
| 345.874    | 2.802                                              | 0.011                                                     | 2.260                                                  | 0.011                                                         |
| 345.549    | 2.801                                              | 0.011                                                     | 2.260                                                  | 0.011                                                         |
| 345.224    | 2.798                                              | 0.011                                                     | 2.258                                                  | 0.011                                                         |
| 344.898    | 2.797                                              | 0.011                                                     | 2.257                                                  | 0.011                                                         |
| 344.574    | 2.797                                              | 0.011                                                     | 2.258                                                  | 0.011                                                         |
| 344.247    | 2.795                                              | 0.011                                                     | 2.258                                                  | 0.011                                                         |
| 343.928    | 2.794                                              | 0.011                                                     | 2.257                                                  | 0.011                                                         |
| 343.596    | 2.793                                              | 0.011                                                     | 2.257                                                  | 0.011                                                         |
| 343.270    | 2.794                                              | 0.011                                                     | 2.258                                                  | 0.011                                                         |
| 342.943    | 2.792                                              | 0.011                                                     | 2.258                                                  | 0.011                                                         |
| 342.621    | 2.792                                              | 0.011                                                     | 2.259                                                  | 0.011                                                         |
| 342.296    | 2.790                                              | 0.011                                                     | 2.257                                                  | 0.011                                                         |
| 341.968    | 2.789                                              | 0.011                                                     | 2.257                                                  | 0.011                                                         |
| 341.645    | 2.789                                              | 0.011                                                     | 2.258                                                  | 0.011                                                         |
| 341.320    | 2.787                                              | 0.011                                                     | 2.257                                                  | 0.011                                                         |
| 340.993    | 2.787                                              | 0.011                                                     | 2.258                                                  | 0.011                                                         |
| 340.671    | 2.784                                              | 0.011                                                     | 2.256                                                  | 0.011                                                         |
| 340.344    | 2.783                                              | 0.011                                                     | 2.256                                                  | 0.011                                                         |
| 340.017    | 2.782                                              | 0.011                                                     | 2.256                                                  | 0.011                                                         |
| 339.692    | 2.781                                              | 0.011                                                     | 2.256                                                  | 0.011                                                         |
| 339.365    | 2.782                                              | 0.011                                                     | 2.257                                                  | 0.011                                                         |
| 339.042    | 2.778                                              | 0.011                                                     | 2.255                                                  | 0.011                                                         |
| 338.718    | 2.777                                              | 0.011                                                     | 2.254                                                  | 0.010                                                         |
| 338.393    | 2.776                                              | 0.011                                                     | 2.254                                                  | 0.011                                                         |
| 338.064    | 2.775                                              | 0.011                                                     | 2.255                                                  | 0.011                                                         |

|         |       |       |       |       |
|---------|-------|-------|-------|-------|
| 337.740 | 2.774 | 0.011 | 2.255 | 0.011 |
| 337.417 | 2.773 | 0.011 | 2.254 | 0.010 |
| 337.091 | 2.775 | 0.011 | 2.256 | 0.011 |
| 336.764 | 2.782 | 0.011 | 2.263 | 0.011 |
| 336.439 | 2.778 | 0.011 | 2.260 | 0.011 |
| 336.114 | 2.776 | 0.011 | 2.259 | 0.011 |
| 335.787 | 2.775 | 0.011 | 2.259 | 0.011 |
| 335.462 | 2.774 | 0.011 | 2.259 | 0.011 |
| 335.137 | 2.769 | 0.011 | 2.256 | 0.011 |
| 334.813 | 2.766 | 0.011 | 2.254 | 0.010 |
| 334.487 | 2.768 | 0.011 | 2.256 | 0.011 |
| 334.161 | 2.767 | 0.011 | 2.257 | 0.011 |
| 333.835 | 2.767 | 0.011 | 2.257 | 0.011 |
| 333.511 | 2.766 | 0.011 | 2.257 | 0.011 |
| 333.184 | 2.765 | 0.011 | 2.257 | 0.011 |
| 332.859 | 2.765 | 0.011 | 2.257 | 0.011 |
| 332.533 | 2.764 | 0.011 | 2.257 | 0.011 |
| 332.208 | 2.764 | 0.011 | 2.258 | 0.010 |
| 331.884 | 2.763 | 0.011 | 2.258 | 0.010 |
| 331.560 | 2.763 | 0.011 | 2.258 | 0.010 |
| 331.238 | 2.764 | 0.011 | 2.260 | 0.010 |
| 330.908 | 2.763 | 0.011 | 2.260 | 0.010 |
| 330.582 | 2.762 | 0.011 | 2.260 | 0.010 |
| 330.257 | 2.762 | 0.011 | 2.260 | 0.010 |
| 329.932 | 2.762 | 0.011 | 2.261 | 0.010 |
| 329.607 | 2.762 | 0.011 | 2.262 | 0.010 |
| 329.279 | 2.762 | 0.011 | 2.262 | 0.010 |
| 328.954 | 2.763 | 0.011 | 2.264 | 0.010 |
| 328.630 | 2.763 | 0.011 | 2.265 | 0.010 |
| 328.305 | 2.765 | 0.011 | 2.267 | 0.010 |
| 327.980 | 2.766 | 0.011 | 2.268 | 0.010 |
| 327.653 | 2.766 | 0.011 | 2.269 | 0.010 |
| 327.328 | 2.768 | 0.010 | 2.272 | 0.010 |
| 327.005 | 2.771 | 0.010 | 2.275 | 0.010 |
| 326.674 | 2.775 | 0.010 | 2.278 | 0.010 |
| 326.352 | 2.779 | 0.010 | 2.283 | 0.010 |
| 326.030 | 2.785 | 0.010 | 2.288 | 0.010 |
| 325.703 | 2.792 | 0.010 | 2.294 | 0.010 |
| 325.376 | 2.811 | 0.010 | 2.310 | 0.010 |
| 325.051 | 2.925 | 0.010 | 2.406 | 0.010 |
| 324.725 | 3.088 | 0.010 | 2.540 | 0.010 |
| 324.400 | 2.995 | 0.010 | 2.464 | 0.010 |
| 324.075 | 2.954 | 0.010 | 2.432 | 0.010 |
| 323.751 | 2.942 | 0.010 | 2.422 | 0.010 |

|         |       |       |       |       |
|---------|-------|-------|-------|-------|
| 323.425 | 2.924 | 0.010 | 2.408 | 0.010 |
| 323.099 | 2.916 | 0.010 | 2.402 | 0.010 |
| 322.776 | 2.903 | 0.010 | 2.392 | 0.010 |
| 322.450 | 2.891 | 0.010 | 2.383 | 0.010 |
| 322.122 | 2.882 | 0.010 | 2.376 | 0.010 |
| 321.797 | 2.875 | 0.010 | 2.371 | 0.010 |
| 321.473 | 2.862 | 0.010 | 2.362 | 0.010 |
| 321.146 | 2.854 | 0.010 | 2.355 | 0.010 |
| 320.822 | 2.846 | 0.010 | 2.350 | 0.010 |
| 320.496 | 2.838 | 0.010 | 2.344 | 0.010 |
| 320.169 | 2.831 | 0.010 | 2.339 | 0.010 |
| 319.849 | 2.823 | 0.010 | 2.333 | 0.010 |
| 319.521 | 2.817 | 0.010 | 2.328 | 0.010 |
| 319.198 | 2.809 | 0.010 | 2.322 | 0.010 |
| 318.871 | 2.803 | 0.010 | 2.318 | 0.010 |
| 318.548 | 2.797 | 0.010 | 2.314 | 0.010 |
| 318.220 | 2.791 | 0.010 | 2.309 | 0.010 |
| 317.894 | 2.784 | 0.010 | 2.305 | 0.010 |
| 317.568 | 2.779 | 0.010 | 2.301 | 0.010 |
| 317.243 | 2.775 | 0.010 | 2.298 | 0.010 |
| 316.917 | 2.770 | 0.010 | 2.295 | 0.010 |
| 316.592 | 2.764 | 0.010 | 2.291 | 0.010 |
| 316.267 | 2.758 | 0.010 | 2.287 | 0.010 |
| 315.941 | 2.754 | 0.010 | 2.284 | 0.010 |
| 315.616 | 2.750 | 0.010 | 2.281 | 0.010 |
| 315.291 | 2.744 | 0.010 | 2.277 | 0.010 |
| 314.965 | 2.737 | 0.010 | 2.271 | 0.010 |
| 314.640 | 2.731 | 0.010 | 2.267 | 0.010 |
| 314.315 | 2.729 | 0.010 | 2.266 | 0.010 |

**Table 9** A part of data of the specific heat capacity and the isobaric heat capacity per unit volume at the critical composition and their uncertainties  $\delta c_{p,s}$  and  $\delta C_p V^{-1}$  at different temperatures for  $\{(1-x_c)$  tert-butanol+  $x_c$  [C<sub>8</sub>mim][PF<sub>6</sub>] $\}$  ( $T_c=320.800$  K)

| $T$<br>(K) | $c_{p,s}$<br>(J·g <sup>-1</sup> ·K <sup>-1</sup> ) | $\delta c_{p,s}$<br>(J·g <sup>-1</sup> ·K <sup>-1</sup> ) | $C_p V^{-1}$<br>(J·cm <sup>-3</sup> ·K <sup>-1</sup> ) | $\delta C_p V^{-1}$<br>(J·cm <sup>-3</sup> ·K <sup>-1</sup> ) |
|------------|----------------------------------------------------|-----------------------------------------------------------|--------------------------------------------------------|---------------------------------------------------------------|
| 348.153    | 2.968                                              | 0.012                                                     | 2.397                                                  | 0.012                                                         |
| 347.827    | 2.967                                              | 0.012                                                     | 2.398                                                  | 0.011                                                         |
| 347.500    | 2.963                                              | 0.012                                                     | 2.396                                                  | 0.011                                                         |
| 347.176    | 2.963                                              | 0.012                                                     | 2.397                                                  | 0.012                                                         |
| 346.850    | 2.965                                              | 0.012                                                     | 2.400                                                  | 0.012                                                         |
| 346.526    | 2.960                                              | 0.012                                                     | 2.397                                                  | 0.011                                                         |
| 346.201    | 2.958                                              | 0.012                                                     | 2.396                                                  | 0.011                                                         |

|         |       |       |       |       |
|---------|-------|-------|-------|-------|
| 345.873 | 2.958 | 0.012 | 2.397 | 0.011 |
| 345.549 | 2.954 | 0.012 | 2.395 | 0.011 |
| 345.222 | 2.952 | 0.012 | 2.394 | 0.011 |
| 344.897 | 2.952 | 0.012 | 2.395 | 0.011 |
| 344.575 | 2.952 | 0.012 | 2.397 | 0.011 |
| 344.248 | 2.952 | 0.012 | 2.398 | 0.011 |
| 343.921 | 2.952 | 0.012 | 2.398 | 0.011 |
| 343.596 | 2.950 | 0.012 | 2.398 | 0.011 |
| 343.272 | 2.949 | 0.012 | 2.398 | 0.011 |
| 342.946 | 2.946 | 0.012 | 2.397 | 0.011 |
| 342.620 | 2.944 | 0.012 | 2.396 | 0.011 |
| 342.295 | 2.941 | 0.012 | 2.394 | 0.012 |
| 341.970 | 2.940 | 0.012 | 2.395 | 0.011 |
| 341.645 | 2.942 | 0.012 | 2.398 | 0.011 |
| 341.318 | 2.941 | 0.012 | 2.398 | 0.011 |
| 340.996 | 2.940 | 0.012 | 2.398 | 0.011 |
| 340.669 | 2.938 | 0.012 | 2.398 | 0.011 |
| 340.342 | 2.935 | 0.012 | 2.396 | 0.011 |
| 340.018 | 2.933 | 0.012 | 2.395 | 0.011 |
| 339.695 | 2.930 | 0.012 | 2.395 | 0.011 |
| 339.370 | 2.930 | 0.012 | 2.395 | 0.012 |
| 339.042 | 2.928 | 0.012 | 2.395 | 0.011 |
| 338.715 | 2.925 | 0.012 | 2.393 | 0.011 |
| 338.391 | 2.925 | 0.012 | 2.394 | 0.011 |
| 338.065 | 2.925 | 0.012 | 2.395 | 0.011 |
| 337.740 | 2.923 | 0.012 | 2.395 | 0.011 |
| 337.414 | 2.921 | 0.012 | 2.394 | 0.011 |
| 337.088 | 2.920 | 0.012 | 2.395 | 0.011 |
| 336.766 | 2.925 | 0.012 | 2.400 | 0.012 |
| 336.437 | 2.919 | 0.012 | 2.396 | 0.012 |
| 336.110 | 2.917 | 0.012 | 2.395 | 0.012 |
| 335.788 | 2.916 | 0.012 | 2.395 | 0.012 |
| 335.460 | 2.915 | 0.012 | 2.395 | 0.012 |
| 335.143 | 2.911 | 0.012 | 2.393 | 0.011 |
| 334.811 | 2.908 | 0.012 | 2.392 | 0.011 |
| 334.489 | 2.906 | 0.012 | 2.391 | 0.011 |
| 334.161 | 2.906 | 0.012 | 2.392 | 0.011 |
| 333.837 | 2.905 | 0.012 | 2.392 | 0.011 |
| 333.509 | 2.903 | 0.012 | 2.392 | 0.011 |
| 333.184 | 2.901 | 0.012 | 2.391 | 0.011 |
| 332.865 | 2.900 | 0.012 | 2.392 | 0.011 |
| 332.534 | 2.899 | 0.012 | 2.391 | 0.011 |
| 332.213 | 2.896 | 0.012 | 2.390 | 0.011 |
| 331.886 | 2.895 | 0.012 | 2.391 | 0.011 |

|         |       |       |       |       |
|---------|-------|-------|-------|-------|
| 331.558 | 2.894 | 0.012 | 2.391 | 0.011 |
| 331.227 | 2.893 | 0.012 | 2.391 | 0.011 |
| 330.911 | 2.892 | 0.012 | 2.391 | 0.011 |
| 330.576 | 2.890 | 0.012 | 2.391 | 0.011 |
| 330.255 | 2.888 | 0.012 | 2.390 | 0.011 |
| 329.931 | 2.888 | 0.012 | 2.391 | 0.011 |
| 329.604 | 2.885 | 0.012 | 2.389 | 0.011 |
| 329.277 | 2.884 | 0.012 | 2.390 | 0.011 |
| 328.958 | 2.883 | 0.012 | 2.390 | 0.011 |
| 328.631 | 2.882 | 0.012 | 2.390 | 0.011 |
| 328.308 | 2.879 | 0.012 | 2.389 | 0.011 |
| 327.973 | 2.878 | 0.012 | 2.389 | 0.011 |
| 327.655 | 2.877 | 0.012 | 2.389 | 0.011 |
| 327.321 | 2.876 | 0.012 | 2.389 | 0.011 |
| 327.008 | 2.874 | 0.012 | 2.388 | 0.011 |
| 326.678 | 2.876 | 0.012 | 2.391 | 0.011 |
| 326.349 | 2.878 | 0.012 | 2.394 | 0.011 |
| 326.022 | 2.872 | 0.012 | 2.390 | 0.011 |
| 325.739 | 2.873 | 0.012 | 2.392 | 0.011 |
| 325.383 | 2.871 | 0.012 | 2.391 | 0.011 |
| 325.051 | 2.865 | 0.012 | 2.387 | 0.011 |
| 324.730 | 2.869 | 0.012 | 2.392 | 0.011 |
| 324.399 | 2.867 | 0.012 | 2.391 | 0.011 |
| 324.074 | 2.867 | 0.012 | 2.392 | 0.011 |
| 323.749 | 2.864 | 0.012 | 2.391 | 0.011 |
| 323.427 | 2.869 | 0.012 | 2.396 | 0.011 |
| 323.100 | 2.864 | 0.012 | 2.393 | 0.011 |
| 322.772 | 2.868 | 0.012 | 2.397 | 0.011 |
| 322.447 | 2.866 | 0.012 | 2.396 | 0.011 |
| 322.125 | 2.872 | 0.012 | 2.403 | 0.011 |
| 321.798 | 2.868 | 0.012 | 2.400 | 0.011 |
| 321.471 | 2.875 | 0.012 | 2.407 | 0.011 |
| 321.153 | 2.878 | 0.012 | 2.410 | 0.011 |
| 320.821 | 2.938 | 0.011 | 2.462 | 0.011 |
| 320.495 | 2.971 | 0.011 | 2.491 | 0.011 |
| 320.173 | 2.965 | 0.011 | 2.486 | 0.011 |
| 319.845 | 2.946 | 0.011 | 2.471 | 0.011 |
| 319.518 | 2.937 | 0.011 | 2.465 | 0.011 |
| 319.194 | 2.945 | 0.011 | 2.473 | 0.011 |
| 318.868 | 2.930 | 0.011 | 2.461 | 0.011 |
| 318.543 | 2.924 | 0.011 | 2.457 | 0.011 |
| 318.218 | 2.919 | 0.011 | 2.454 | 0.011 |
| 317.895 | 2.915 | 0.011 | 2.451 | 0.011 |
| 317.568 | 2.912 | 0.011 | 2.450 | 0.011 |

|         |       |       |       |       |
|---------|-------|-------|-------|-------|
| 317.244 | 2.902 | 0.011 | 2.443 | 0.011 |
| 316.918 | 2.898 | 0.011 | 2.441 | 0.011 |
| 316.590 | 2.899 | 0.011 | 2.443 | 0.011 |
| 316.265 | 2.897 | 0.011 | 2.442 | 0.011 |
| 315.944 | 2.879 | 0.011 | 2.428 | 0.011 |
| 315.617 | 2.885 | 0.011 | 2.434 | 0.011 |
| 315.290 | 2.887 | 0.011 | 2.436 | 0.011 |
| 314.964 | 2.884 | 0.011 | 2.435 | 0.011 |
| 314.639 | 2.875 | 0.011 | 2.429 | 0.011 |
| 314.314 | 2.871 | 0.011 | 2.426 | 0.011 |

---
